# Supplementary material
Source: publisher figshare collection journal article supplement (https://acs.figshare.com/ndownloader/files/5113975)

# **Supporting Information**

## **Total Synthesis of Naturally Occurring Diacetylenic Spiroacetal Enol Ethers**

Naoki Miyakoshi, Daisuke Aburano, and Chisato Mukai\*

Division of Pharmaceutical Sciences, Graduate School of Natural Science and Technology,  
Kanazawa University, Kakuma-machi, Kanazawa 920-1192,  
JAPAN

## Table of Contents

|                                                                                                                                         |     |
|-----------------------------------------------------------------------------------------------------------------------------------------|-----|
| General                                                                                                                                 | S3  |
| Preparation and characterization data for compounds (+)- <b>24</b>                                                                      | S3  |
| Preparation and characterization data for compounds (-)- <b>25</b> , (-)- <b>26</b>                                                     | S4  |
| Preparation and characterization data for compounds (-)- <b>27</b> , (-)- <b>30</b> , (+)- <b>32</b>                                    | S5  |
| Preparation and characterization data for compounds, (+)- <b>36</b>                                                                     | S6  |
| Characterization data for compounds (+)- <b>17</b>                                                                                      | S6  |
| Characterization data for compounds (+)- <b>18</b> , (+)- <b>19</b> , (-)- <b>20</b> , (+)- <b>22</b> , (+)- <b>29</b> , (+)- <b>30</b> | S7  |
| <sup>1</sup> H and <sup>13</sup> C NMR spectra for compound (-)- <b>AL-2 (2)</b>                                                        | S8  |
| <sup>1</sup> H and <sup>13</sup> C NMR spectra for compound (+)- <b>3</b>                                                               | S9  |
| <sup>1</sup> H and <sup>13</sup> C NMR spectra for compound (-)- <b>4</b>                                                               | S10 |
| <sup>1</sup> H and <sup>13</sup> C NMR spectra for compound (-)- <b>5</b>                                                               | S11 |
| <sup>1</sup> H and <sup>13</sup> C NMR spectra for compound (-)- <b>6</b>                                                               | S12 |
| <sup>1</sup> H and <sup>13</sup> C NMR spectra for compound (-)- <b>17</b>                                                              | S13 |
| <sup>1</sup> H and <sup>13</sup> C NMR spectra for compound (-)- <b>22</b>                                                              | S14 |
| <sup>1</sup> H and <sup>13</sup> C NMR spectra for compound (+)- <b>24</b>                                                              | S15 |
| <sup>1</sup> H and <sup>13</sup> C NMR spectra for compound (-)- <b>27</b>                                                              | S16 |
| <sup>1</sup> H and <sup>13</sup> C NMR spectra for compound (-)- <b>28</b>                                                              | S17 |
| <sup>1</sup> H and <sup>13</sup> C NMR spectra for compound (-)- <b>29</b>                                                              | S18 |
| <sup>1</sup> H and <sup>13</sup> C NMR spectra for compound (-)- <b>30</b>                                                              | S19 |
| <sup>1</sup> H and <sup>13</sup> C NMR spectra for compound (+)- <b>31</b>                                                              | S20 |
| <sup>1</sup> H and <sup>13</sup> C NMR spectra for compound (+)- <b>32</b>                                                              | S21 |
| <sup>1</sup> H and <sup>13</sup> C NMR spectra for compound (+)- <b>36</b>                                                              | S22 |

**General.** Melting points are uncorrected. IR spectra were measured in  $\text{CHCl}_3$ .  $^1\text{H}$  NMR spectra were taken in  $\text{CDCl}_3$ .  $\text{CHCl}_3$  (7.26 ppm) for silyl compounds and tetramethylsilane (0.00 ppm) for compounds without a silyl group was used as an internal standard.  $^{13}\text{C}$  NMR spectra were recorded in  $\text{CDCl}_3$  with  $\text{CHCl}_3$  (77.0 ppm) as an internal standard. All reaction were carried out under a nitrogen atmosphere unless otherwise stated. Silica gel (silica gel 60, 230-400 mesh) was used for chromatography. Organic extracts were dried over anhydrous  $\text{Na}_2\text{SO}_4$ .

**6-[(1*R*,2*S*)-1-Benzoyloxy-2-(*tert*-Butyldiphenylsiloxy)-but-3-ynyl]-3,4-dihydro-2*H*-pyran. (+)-**24**.** According to the procedure described for the preparation of (-)-**22**, (-)-**20** (61.0 mg, 0.10 mmol) was converted to the corresponding alcohol. A solution of  $\text{PdCl}_2(\text{MeCN})_2$  (13.0 mg, 0.050 mmol) in MeOH (3.5 mL) was stirred under a CO atmosphere at room temperature for 10 min, to which a solution of the crude alcohol and benzoquinone (11.9 mg, 0.11 mmol) in MeOH (1.5 mL) was added. After being stirred for 30 min, MeOH was evaporated off and the residue was taken up in  $\text{CH}_2\text{Cl}_2$ , which was successively washed with saturated aqueous  $\text{Na}_2\text{S}_2\text{O}_3$ , saturated aqueous  $\text{NaHCO}_3$ , water, and brine, dried, and concentrated to dryness. The residue was passed through a short pad of silica gel with hexane-AcOEt (5:1) to afford the crude tetrahydropyran derivative. CSA (4.60 mg,  $0.20 \times 10^{-1}$  mmol) and Molecular sieves 4 A (50.0 mg) were added to a solution of the crude tetrahydropyran derivative and the reaction mixture was stirred for 4 h at room temperature, quenched by addition of  $\text{Et}_3\text{N}$  (1.0 mL), and solid was filtered off. The filtrate was concentrated to leave the residual oil, which was chromatographed with hexane-AcOEt (5:1) to afford (+)-**24** (29.0 mg, 59%) as a colorless oil:  $[\alpha]_D^{24} +61.3$  ( $c$  0.72,  $\text{CHCl}_3$ ); IR 3308, 1674  $\text{cm}^{-1}$ ;  $^1\text{H}$  NMR  $\delta$  7.75-7.70 (m, 4H), 7.40-7.34 (m, 2H), 7.31-7.22 (m, 9H), 4.80 (t, 1H,  $J = 3.5$  Hz), 4.64(dd, 1H,  $J = 7.3, 2.0$  Hz), 4.64, 4.44 (AB-q, 2H,  $J = 11.7$  Hz), 3.91 (m, 2H), 3.75 (d, 1H,  $J = 7.3$  Hz), 2.21 (d, 1H,  $J = 2.0$  Hz), 2.02 (m, 2H), 1.76 (m, 2H), 1.07 (s, 9H);  $^{13}\text{C}$  NMR  $\delta$  149.7, 138.3, 136.3, 136.1, 133.6, 133.5, 129.5, 128.1, 128.0, 127.3, 127.3, 127.2, 101.6, 83.7, 82.5, 73.8, 70.8, 66.1, 65.7, 26.9, 22.2, 20.1, 19.4; FABMS  $m/z$  497 ( $\text{M}^+ + 1$ , 2.0). FABHRMS calcd for  $\text{C}_{32}\text{H}_{37}\text{O}_3\text{Si}$

497.2512, found 497.2518.

**(2*E*,3*R*,4*R*,5*R*)-4-Benzoyloxy-3-(*tert*-butyldiphenylsiloxy)-2-(2-hydroxyethylidene)-1,6-dioxaspiro[4.5]decane ((-)-**25**).** DIBAL-H in hexane (1.00 M, 0.30 mL, 0.30 mmol) was added to a solution of (-)-**22** (16.0 mg,  $0.28 \times 10^{-1}$  mmol) in CH<sub>2</sub>Cl<sub>2</sub> (3.0 mL) at -78 °C. The mixture was stirred for 30 min, quenched by addition of saturated aqueous Na<sub>2</sub>SO<sub>4</sub>, and the resulting solid was filtered off. The filtrate was concentrated to leave the residual oil, which was chromatographed with hexane-AcOEt (2:1) to afford (-)-**25** (14.0 mg, 92%) as a colorless oil:  $[\alpha]_D^{24} -68.7$  (*c* 0.77, CHCl<sub>3</sub>); IR 3564, 1686 cm<sup>-1</sup>; <sup>1</sup>H NMR  $\delta$  7.80-7.74 (4H, m) 7.48-7.41 (m, 6H), 5.25 (dt, 1H, *J* = 1.3, 7.9 Hz), 4.58 (br-s, 1H), 4.14-3.68(m, 5H), 1.85-1.60(m, 6H), 1.06 (s, 9H); <sup>13</sup>C NMR  $\delta$  158.5, 136.0, 136.0, 133.3, 132.9, 130.2, 130.0, 128.0, 127.8, 107.3, 102.0, 80.9, 62.2, 58.6, 28.2, 26.8, 24.9, 19.4, 19.0; MS *m/z* 454 (M<sup>+</sup>, 0.1). HRMS calcd for C<sub>26</sub>H<sub>34</sub>O<sub>5</sub>Si 454.2175, found 454.2174. Anal. Calcd for C<sub>33</sub>H<sub>40</sub>O<sub>5</sub>Si: C, 72.76; H, 7.40. Found: C, 72.70, H, 7.53.

**(2*E*,3*R*,4*R*,5*R*)-4-Benzoyloxy-3-(*tert*-butyldiphenylsiloxy)-2-propynylidene-1,6-dioxaspiro[4.5]decane ((-)-**26**).** A suspension of (-)-**25** (7.00 mg,  $0.12 \times 10^{-1}$  mmol) and chemical manganese dioxide (18.3mg, 0.26 mmol) in CH<sub>2</sub>Cl<sub>2</sub> (2.0 mL) was stirred at room temperature for 1 h. The mixture was filtered off and the filtrate was concentrated to leave the crude aldehyde. The crude aldehyde was converted to the title compound (5.80 mg,  $0.11 \times 10^{-1}$  mmol) by the procedure described for conversion of (-)-**17** into (-)-**18**. Compound (-)-**26** was a colorless plate: mp 130-131 °C (EtOH);  $[\alpha]_D^{25} -68.5$  (*c* 0.74, CHCl<sub>3</sub>); IR 3308, 2110, 1655 cm<sup>-1</sup>; <sup>1</sup>H NMR  $\delta$  7.83-7.80 (m, 4H), 7.44-7.35 (m, 6H), 7.22-7.20 (m, 3H), 6.96-6.94 (m, 2H), 5.08 (d, 1H, *J* = 3.0 Hz), 4.84 (s, 1H), 3.96 (dt, 1H, *J* = 3.0, 11.7 Hz), 3.75 (m, 1H), 3.71, 3.67 (AB-q, 2H, *J* = 11.7 Hz), 3.58 (s, 1H), 2.69 (d, 1H *J* = 3.0 Hz), 1.88-1.57 (m, 6H), 1.07 (s, 9H); <sup>13</sup>C NMR  $\delta$  169.8, 137.7, 136.5, 133.8, 133.2, 129.7, 128.1, 127.6, 127.4, 127.1, 110.3, 86.5, 82.5, 80.7, 79.9, 74.6, 71.2, 62.3, 28.8, 26.9, 24.9, 19.6, 19.1; Anal. Calcd for C<sub>34</sub>H<sub>38</sub>O<sub>2</sub>Si: C, 75.80; H, 7.11. Found: C, 75.58, H, 7.20.

**(2*E*,3*R*,4*R*,5*R*)-4-Benzoyloxy-2-propynylidene-1,6-dioxaspiro[4.5]decan-3-ol ((-)-27).**

To a solution of (-)-**26** (10.0 mg,  $0.18 \times 10^{-1}$  mmol) in THF (2.0 mL) was added TBAF in THF (1.00 M, 0.1 mL, 0.1 mmol) and the reaction mixture was stirred for 4 h at room temperature, quenched by addition of water, and extracted with Et<sub>2</sub>O. The extract was washed with water and brine, dried, and concentrated to dryness. Chromatography of the residue with hexane-AcOEt (4:1) afforded (-)-**27** (5.10 mg, 94%) as a colorless oil:  $[\alpha]_D^{23} -106.9$  (*c* 0.38, CHCl<sub>3</sub>); IR 3693, 3306, 2106, 1655 cm<sup>-1</sup>; <sup>1</sup>H NMR  $\delta$  7.37-7.28 (m, 5H), 5.14 (d, 1H, *J* = 2.4 Hz), 4.78 (d, 1H, *J* = 8.8 Hz), 4.74, 4.55 (AB-q, 2H, *J* = 11.7 Hz), 3.88 (dt, 1H, *J* = 2.9, 11.2 Hz), 3.73 (s, 1H), 3.72-3.69 (m, 1H), 3.04 (d, 1H, *J* = 2.4 Hz), 2.97 (d, 1H, *J* = 8.8 Hz), 2.06-2.01 (m, 1H), 1.85-1.58 (m, 5H); <sup>13</sup>C NMR  $\delta$  167.0, 128.5, 128.0, 127.7, 110.1, 85.5, 83.2, 80.0, 79.4, 73.4, 71.8, 62.6, 28.0, 24.7, 18.6; FABMS *m/z* 301 (*M*<sup>+</sup>+1, 12.0). FABHRMS calcd for C<sub>18</sub>H<sub>21</sub>O<sub>4</sub> 301.1440, found 301.1438.

**(2*E*,3*R*,4*R*,5*R*)-3-(*tert*-Butyldiphenylsiloxy)-2-propynylidene-1,6-**

**dioxaspiro[4.5]decan-4-ol ((-)-30).** According to the procedure for the preparation of (-)-**26**, (-)-**29** was converted to the corresponding alkyne. The title compound was obtained in 84% yield as a colorless oil:  $[\alpha]_D^{25} -80.7$  (*c* 0.44, CHCl<sub>3</sub>); IR 3568, 3308, 2110, 1655 cm<sup>-1</sup>; <sup>1</sup>H NMR  $\delta$  7.82-7.78 (m, 4H), 7.46-7.37 (m, 6H), 5.18 (d, 1H, *J* = 3.0 Hz), 4.71 (s, 1H), 3.93 (dt, 1H, *J* = 3.4, 11.7 Hz), 3.75 (s, 1H), 3.73 (m, 1H), 2.77 (d, 1H *J* = 3.0 Hz), 1.82-1.48 (m, 6H), 1.10 (s, 9H); <sup>13</sup>C NMR  $\delta$  168.8, 136.3, 136.1, 134.0, 133.0, 129.9, 129.8, 127.6, 127.6, 109.5, 82.8, 80.5, 80.3, 80.2, 78.8, 62.5, 28.1, 26.9, 24.7, 19.6, 18.9; MS *m/z* 448 (*M*<sup>+</sup>, 3.4). HRMS calcd for C<sub>27</sub>H<sub>32</sub>O<sub>4</sub>Si 448.2070, found 448.2073.

**(2*E*,3*R*,4*R*,5*R*)-4-Benzoyloxy-2-(2,4-hexadiynylidene)-1,6-dioxaspiro[4.5]decan-3-ol**

**((+)-32).** According to the procedure described for coupling reaction of (+)-**28**, (+)-**31** (5.90 mg,  $0.19 \times 10^{-1}$  mmol) was converted into (+)-**32** (4.00 mg, 60%) as a colorless oil:  $[\alpha]_D^{26} +183.0$  (*c*

0.092, CHCl<sub>3</sub>); IR 3547, 2142, 1728, 1649 cm<sup>-1</sup>; <sup>1</sup>H NMR δ 8.03-7.98 (m, 2H), 7.60 (m, 1H), 7.48-7.42 (m, 2H), 5.29 (s, 1H), 5.24 (d, 1H, *J* = 1.0 Hz), 4.76 (d, 1H, *J* = 9.9 Hz), 3.92 (dt, 1H, *J* = 3.3, 10.9 Hz), 3.80 (m, 1H), 2.98 (d, 1H, *J* = 9.9 Hz), 1.95 (d, 3H, *J* = 1.0 Hz), 1.92-1.58 (m, 6H); <sup>13</sup>C NMR δ 170.7, 164.9, 133.6, 129.9, 128.9, 128.6, 109.9, 84.1, 80.1, 79.7, 77.4, 74.6, 69.7, 68.0, 64.7, 62.8, 27.6, 24.4, 18.5, 4.6; MS *m/z* 352 (M<sup>+</sup>, 14.5). HRMS calcd for C<sub>21</sub>H<sub>20</sub>O<sub>5</sub> 352.1311, found 352.1310.

**(2*E*,3*S*,4*R*,5*S*)-3,4-Epoxy-2-propynylidene-1,6-dioxaspiro[4.5]decane (+)-36.** MsCl (0.27 x 10<sup>-1</sup> mL, 0.36 mmol) was added to a solution of (-)-**30** (16.0 mg, 0.36 x 10<sup>-1</sup> mmol), Et<sub>3</sub>N (0.10 mL, 0.72 mmol) in CH<sub>2</sub>Cl<sub>2</sub> (1.0 mL) at 0 °C. After being stirred for 5 min, the reaction mixture was quenched by addition of water and extracted with CH<sub>2</sub>Cl<sub>2</sub>, which was washed with water and brine, dried, and concentrated to dryness. The residue was passed through a short pad of silica gel with hexane-AcOEt (5:1) to afford the crude mesylate. TBAF (1.0M solution of THF, 0.36 mL, 0.36 mmol) was added to a solution of the crude mesylate in THF (3.0 mL) and the reaction mixture was stirred for 1 h at room temperature, refluxed for 3h, quenched by addition of water, and extracted with Et<sub>2</sub>O. The extract was washed with water and brine, dried, and concentrated to dryness. Chromatography of the residue with hexane-AcOEt (5:1) afforded (+)-**36** (6.90 mg, quant.) as a colorless oil: [α]<sub>D</sub><sup>28</sup> +167.6 (*c* 0.10, CHCl<sub>3</sub>); IR 3308, 2106, 1661 cm<sup>-1</sup>; <sup>1</sup>H NMR δ 5.11 (d, 1H, *J*=2.4 Hz), 4.29 (d, 1H, *J*=2.9 Hz), 3.91-3.88 (m, 2H), 3.79 (d, 1H, *J*=2.9 Hz), 2.94 (d, 1H, *J*=2.4 Hz), 1.86-1.60 (m, 6H); <sup>13</sup>C NMR δ 162.2, 134.8, 129.7, 127.7, 105.7, 85.1, 79.0, 64.7, 58.8, 52.1, 30.6, 29.7, 26.6, 24.4, 18.0; MS *m/z* 192 (M<sup>+</sup>, 9.0). HRMS calcd for C<sub>21</sub>H<sub>20</sub>O<sub>5</sub> 192.0786, found 192.0796.

**(2*R*,3*R*)-3-Benzoyloxy-4-(*tert*-butyldimethylsiloxy)-2-(*tert*-butyldiphenylsiloxy)butan-1-ol ((+)-17):** colorless oil: [α]<sub>D</sub><sup>28</sup> +15.1 (*c* 1.00, CHCl<sub>3</sub>) Anal. Calcd for C<sub>33</sub>H<sub>48</sub>O<sub>4</sub>Si<sub>2</sub>: C, 70.16; H, 8.56. Found: C, 69.84, H, 8.57.

**(3*R*,4*R*)-4-Benzoyloxy-5-(*tert*-butyldimethylsiloxy)-3-(*tert*-butyldiphenylsiloxy)pent-1-yne ((+)-18):** colorless oil:  $[\alpha]_{\text{D}}^{30} +0.1$  (*c* 0.93, CHCl<sub>3</sub>); Anal. Calcd for C<sub>34</sub>H<sub>46</sub>O<sub>3</sub>Si<sub>2</sub>: C, 73.07; H, 8.30. Found: C, 72.78, H, 8.42.

**(2*R*,3*R*)-2-Benzoyloxy-3-(*tert*-butyldiphenylsiloxy)-4-pentyn-1-ol ((+)-19):** colorless oil:  $[\alpha]_{\text{D}}^{26} +5.7$  (*c* 1.00, CHCl<sub>3</sub>); Anal. Calcd for C<sub>28</sub>H<sub>32</sub>O<sub>3</sub>Si: C, 75.63; H, 7.25. Found: C, 75.51, H, 7.25.

**(3*R*,4*S*)-4-Benzoyloxy-9-(*tert*-butyldimethylsiloxy)-3-(*tert*-butyldiphenylsiloxy)-1-nonyn-5-one ((-)-20):** colorless oil:  $[\alpha]_{\text{D}}^{26} -39.8$  (*c* 1.05, CHCl<sub>3</sub>); Anal. Calcd for C<sub>38</sub>H<sub>52</sub>O<sub>4</sub>Si<sub>2</sub>: C, 72.56; H, 8.33. Found: C, 72.29, H, 8.58.

**(2*E*,3*S*,4*S*,5*S*)-4-Benzoyloxy-3-(*tert*-butyldiphenylsiloxy)-2-methoxycarbonylmethylidene-1,6-dioxaspiro[4.5]decane ((+)-22):**  $[\alpha]_{\text{D}}^{24} +75.6$  (*c* 0.21, CHCl<sub>3</sub>); FABMS *m/z* 573 (M<sup>+</sup>+1, 1.4). FABHRMS calcd for C<sub>34</sub>H<sub>41</sub>O<sub>6</sub>Si 573.2672, found 573.2640.

**(2*E*,3*S*,4*S*,5*S*)-3-(*tert*-Butyldiphenylsiloxy)-2-(2-hydroxyethylidene)-1,6-dioxaspiro[4.5]decan-4-ol ((+)-29):** colorless needles: mp. 168.5-169.5 °C (hexane-AcOEt);  $[\alpha]_{\text{D}}^{25} +70.4$  (*c* 0.19, THF); Anal. Calcd for C<sub>26</sub>H<sub>34</sub>O<sub>5</sub>Si: C, 68.69; H, 7.54. Found: C, 68.62, H, 7.63.

**(2*E*,3*S*,4*S*,5*S*)-3-(*tert*-Butyldiphenylsiloxy)-2-propynylidene-1,6-dioxaspiro[4.5]decan-4-ol ((+)-30):** colorless oil:  $[\alpha]_{\text{D}}^{25} +82.03$  (*c* 0.27, CHCl<sub>3</sub>); MS *m/z* 448 (M<sup>+</sup>, 0.7). HRMS calcd for C<sub>27</sub>H<sub>32</sub>O<sub>4</sub>Si 448.2070, found 448.2073.

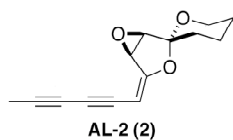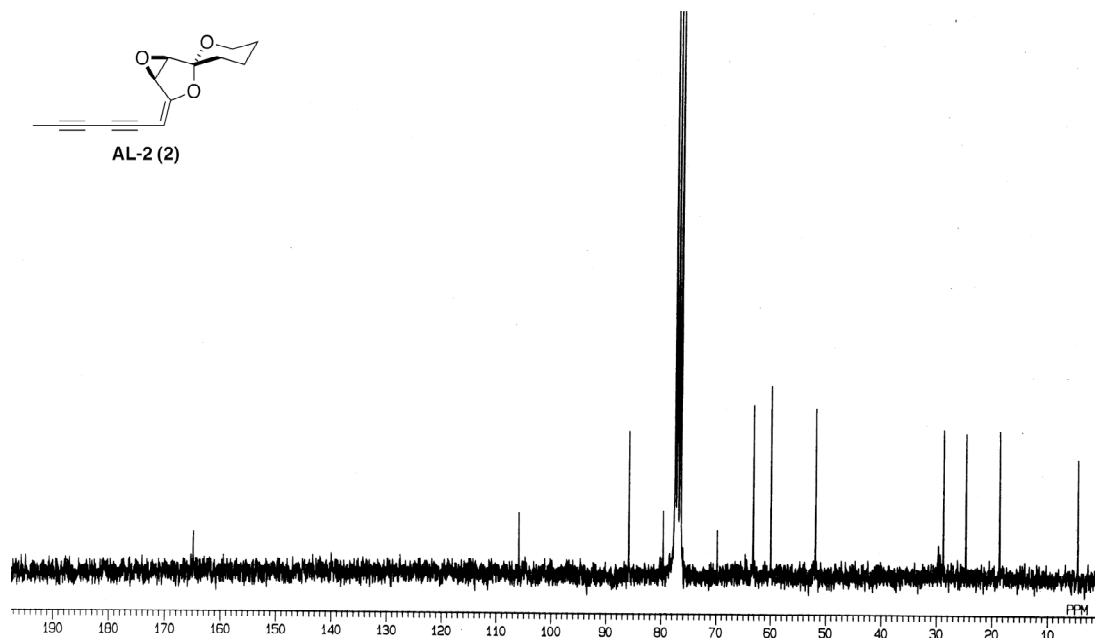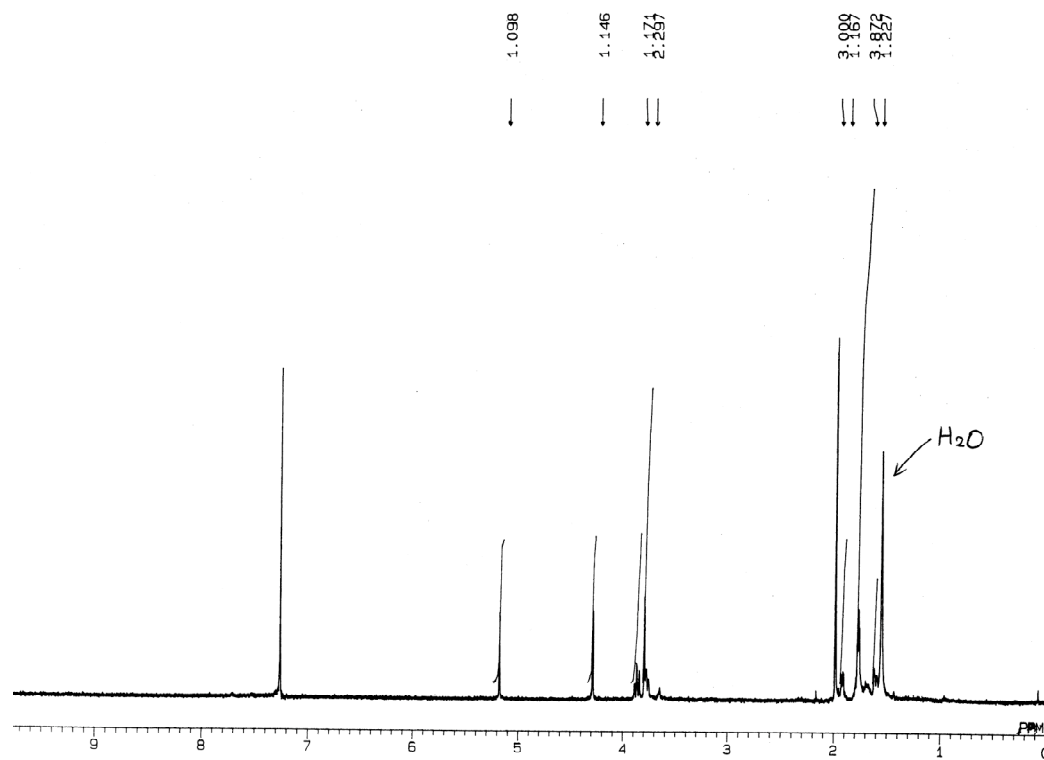



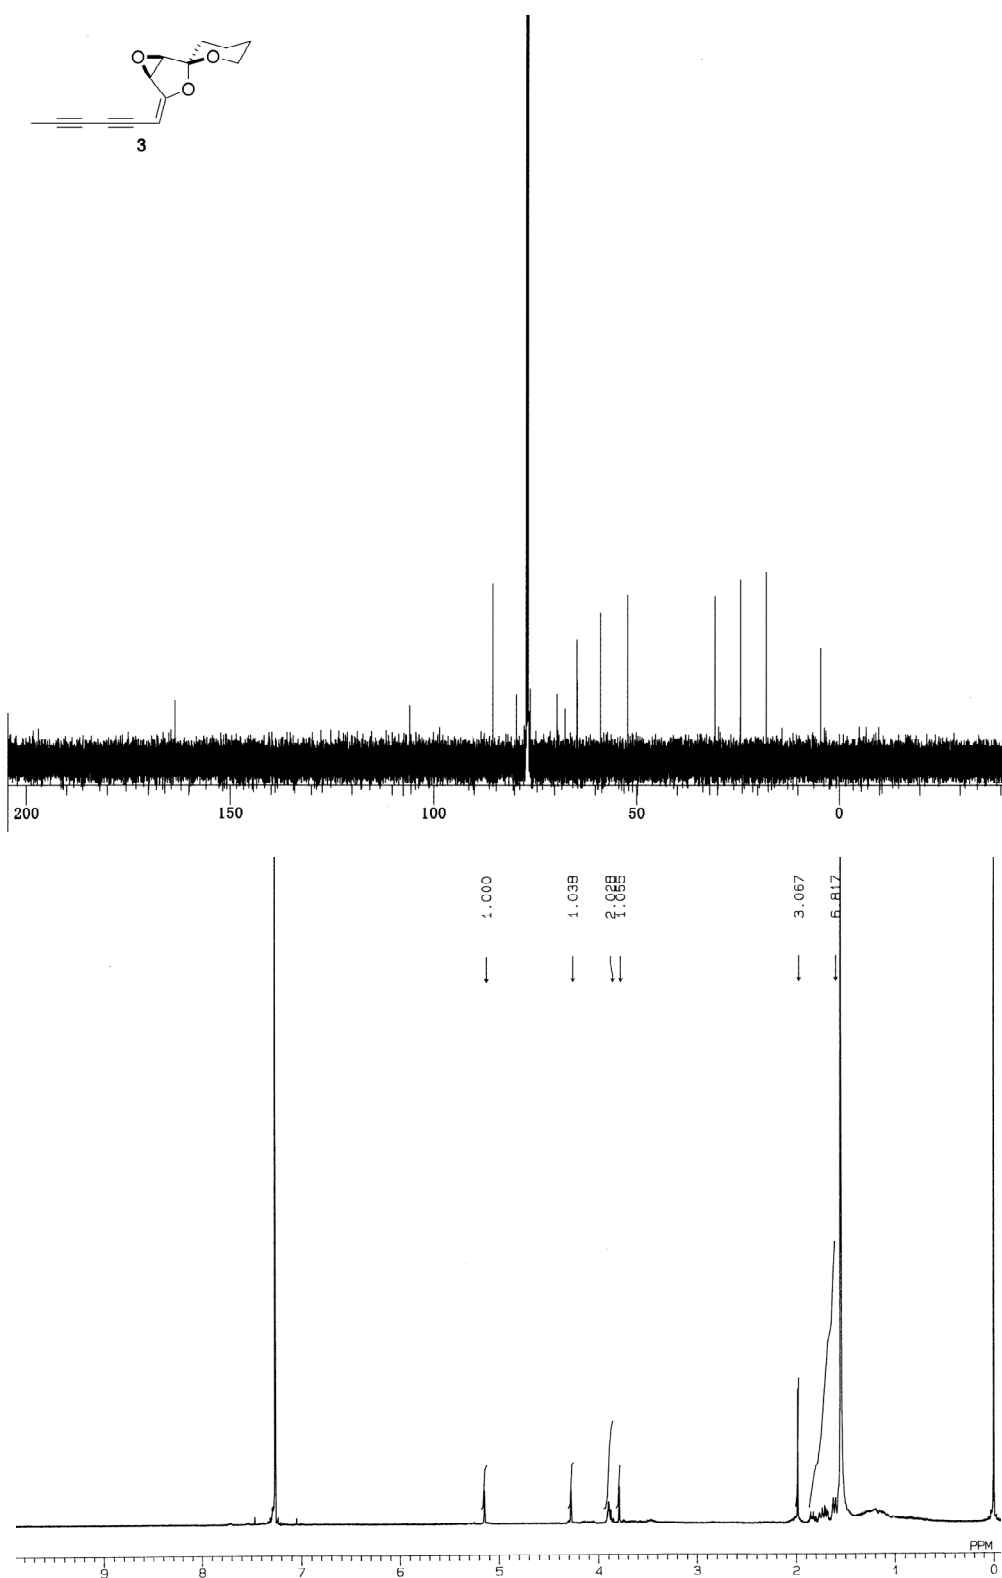

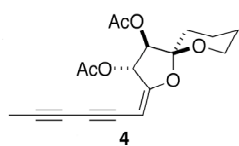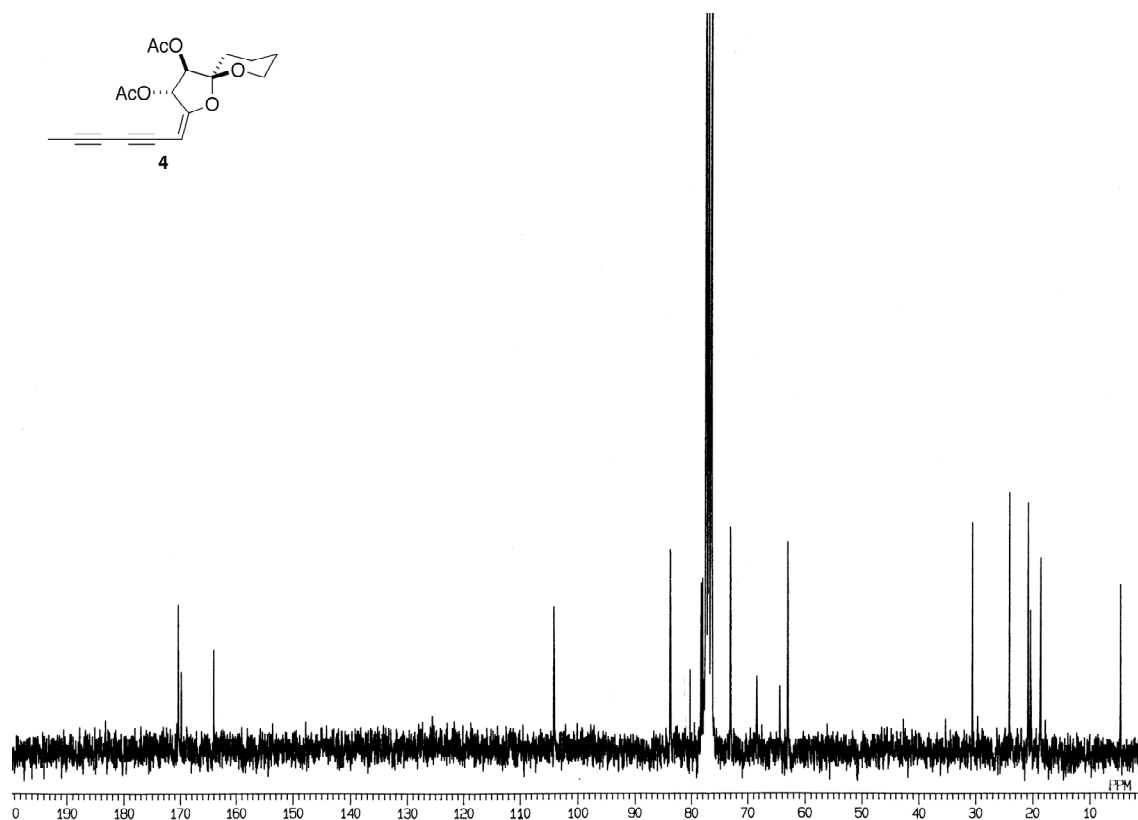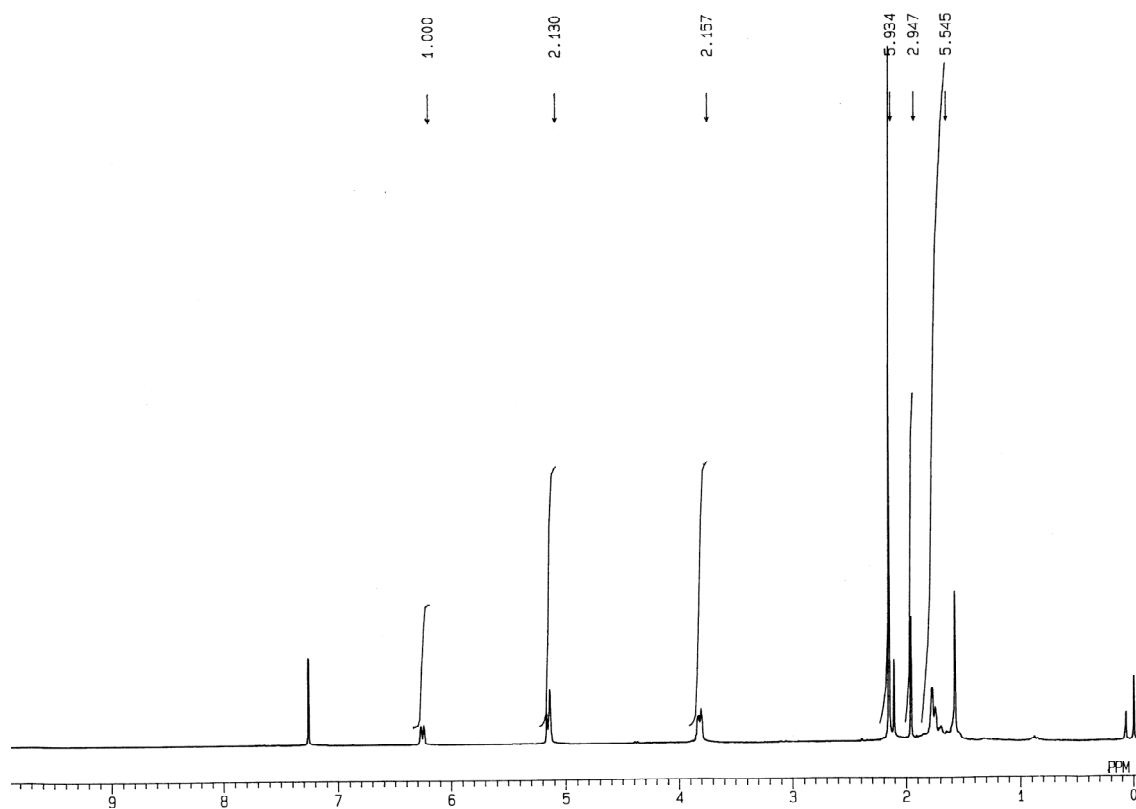

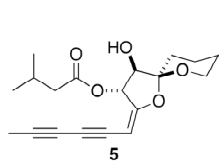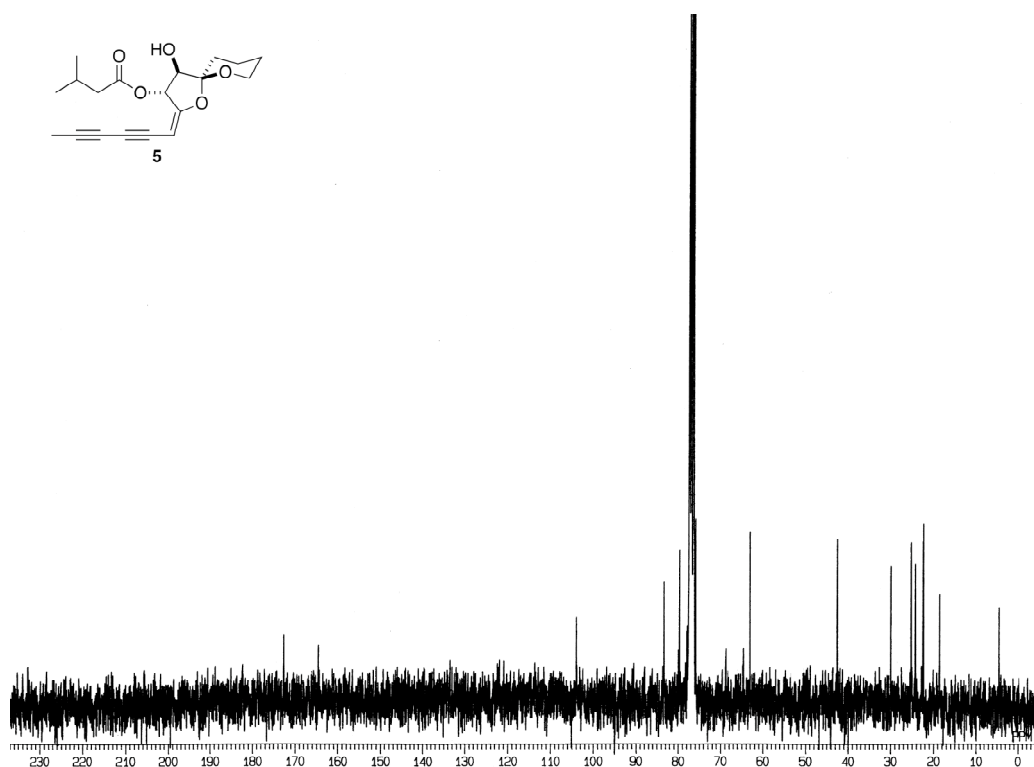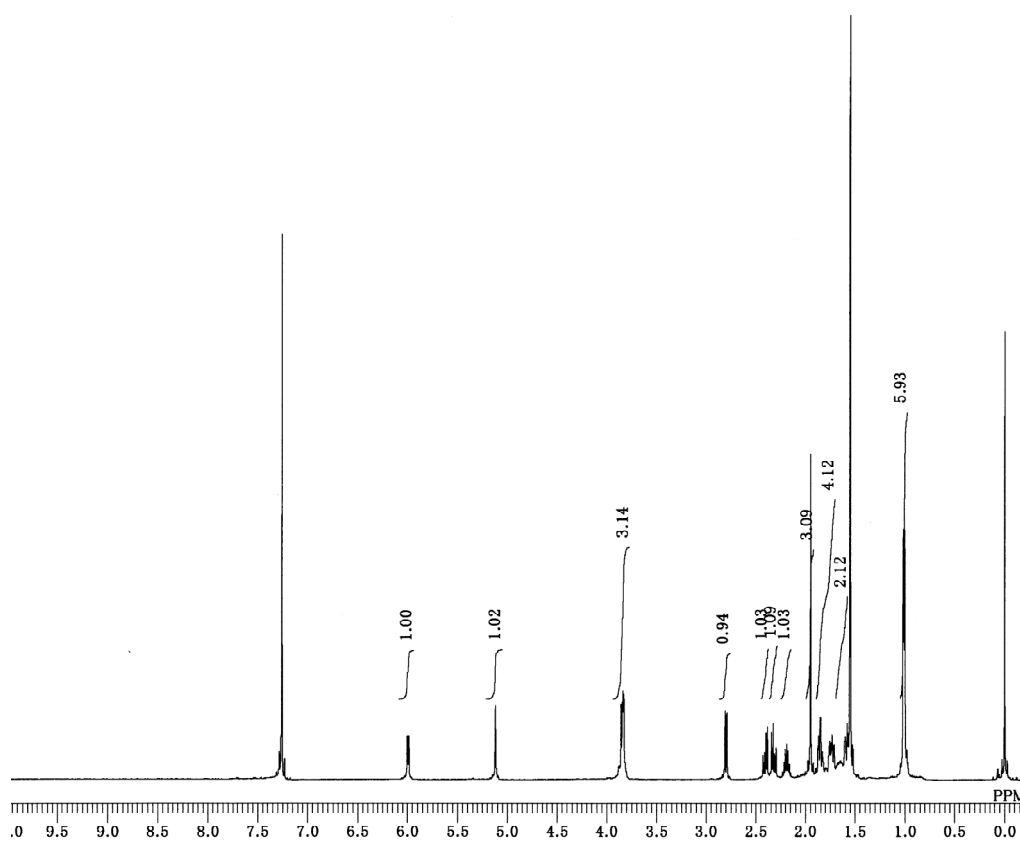

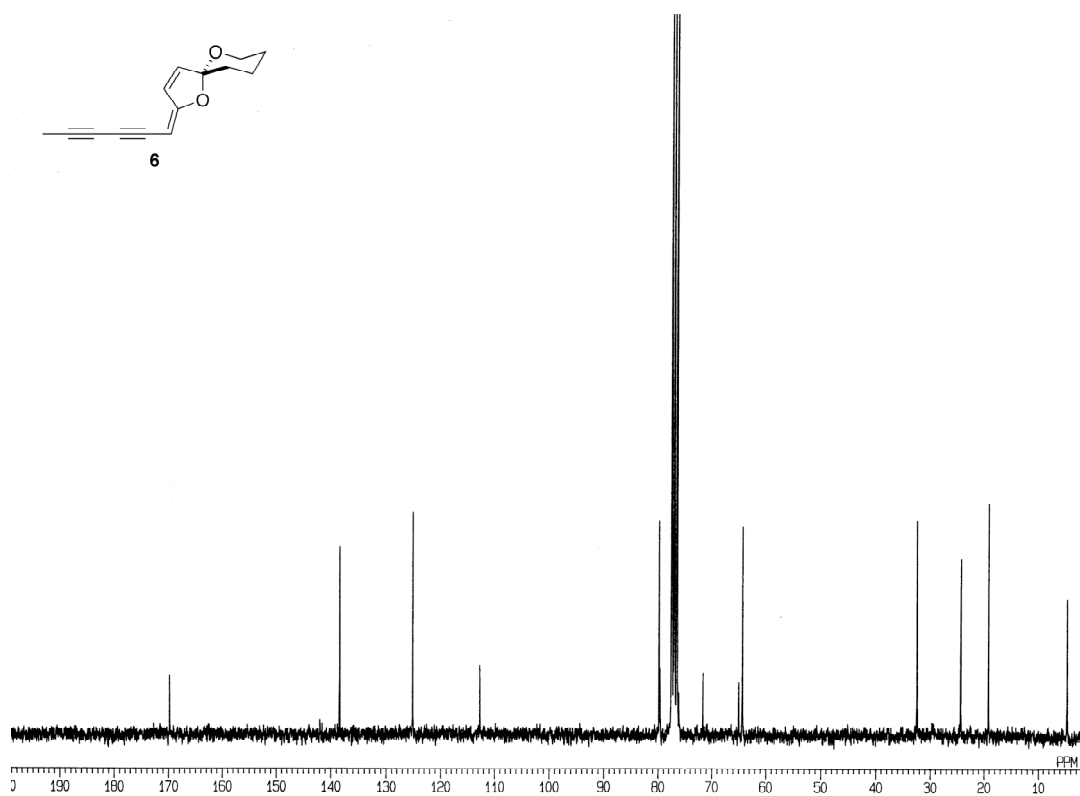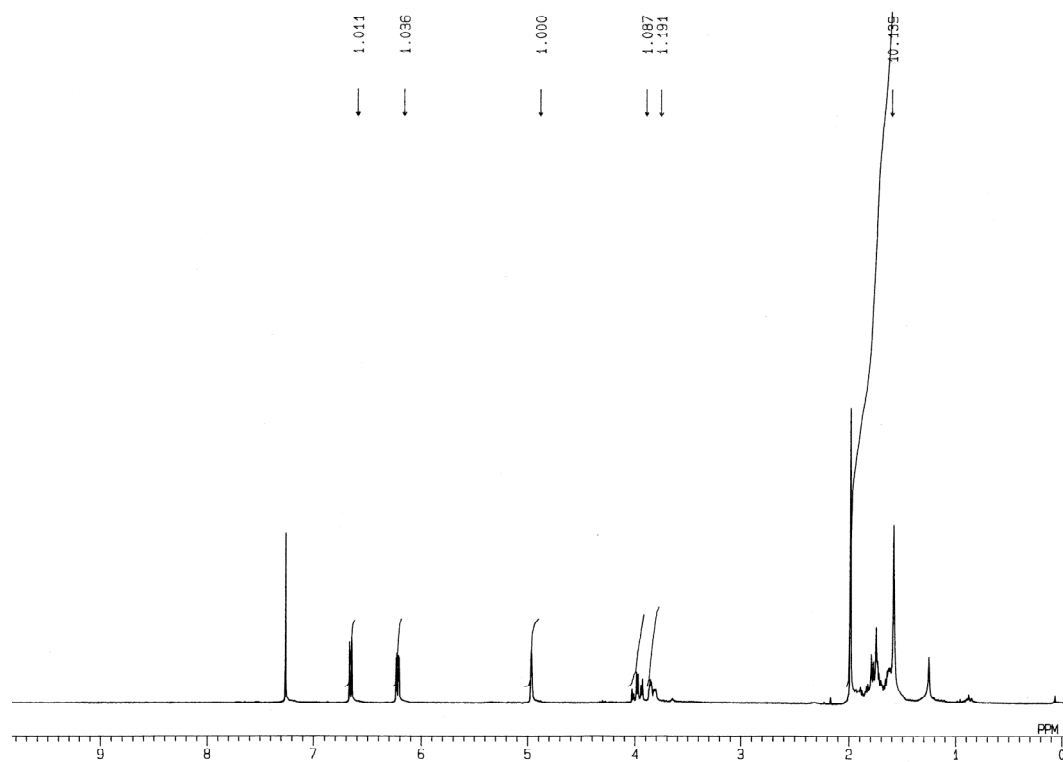

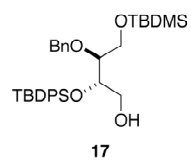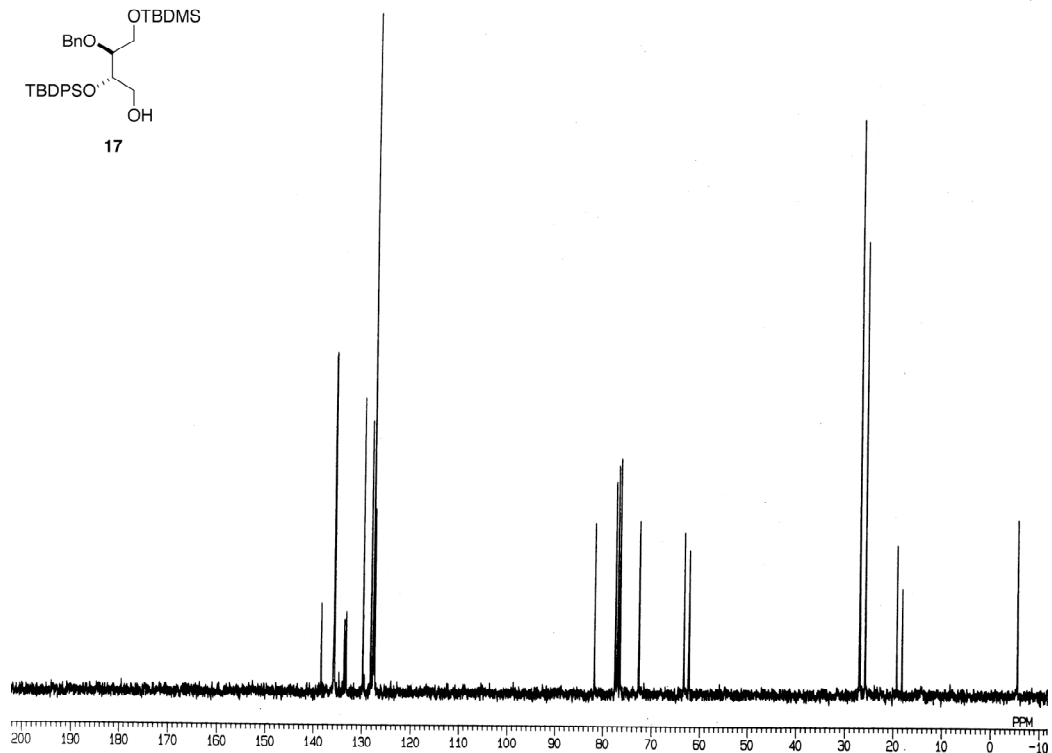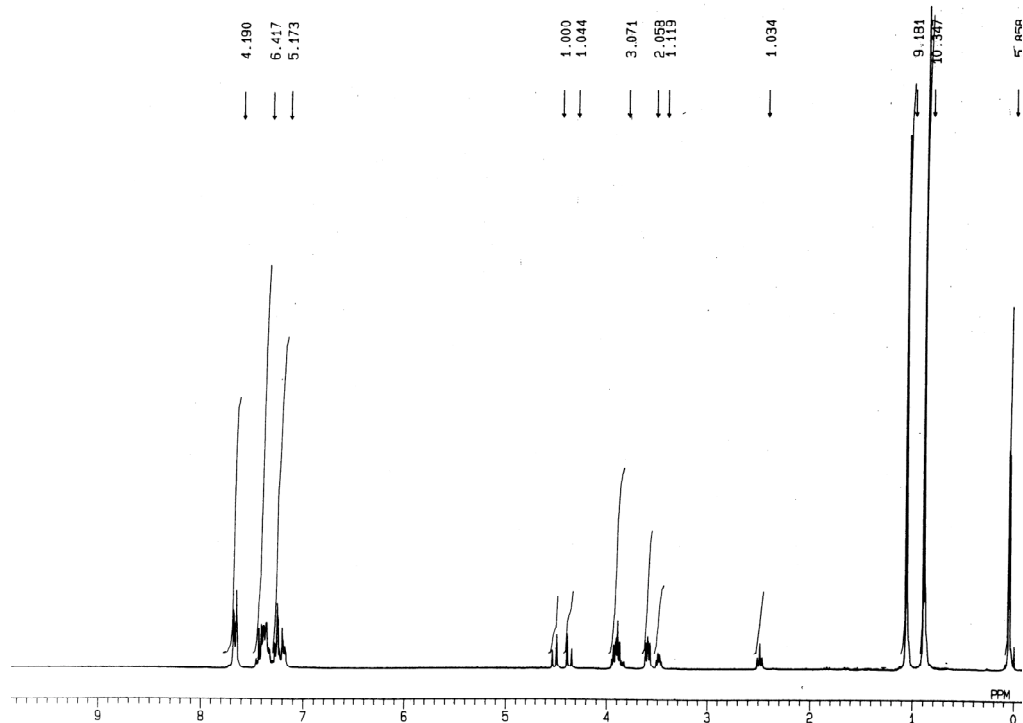

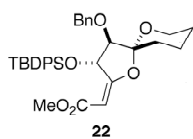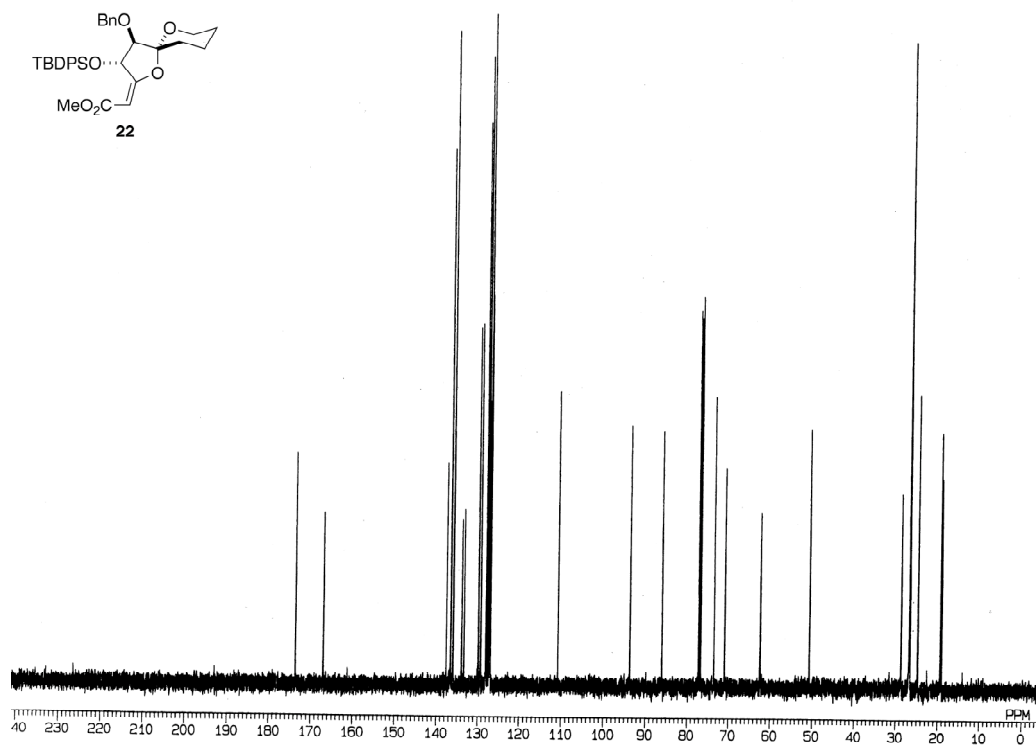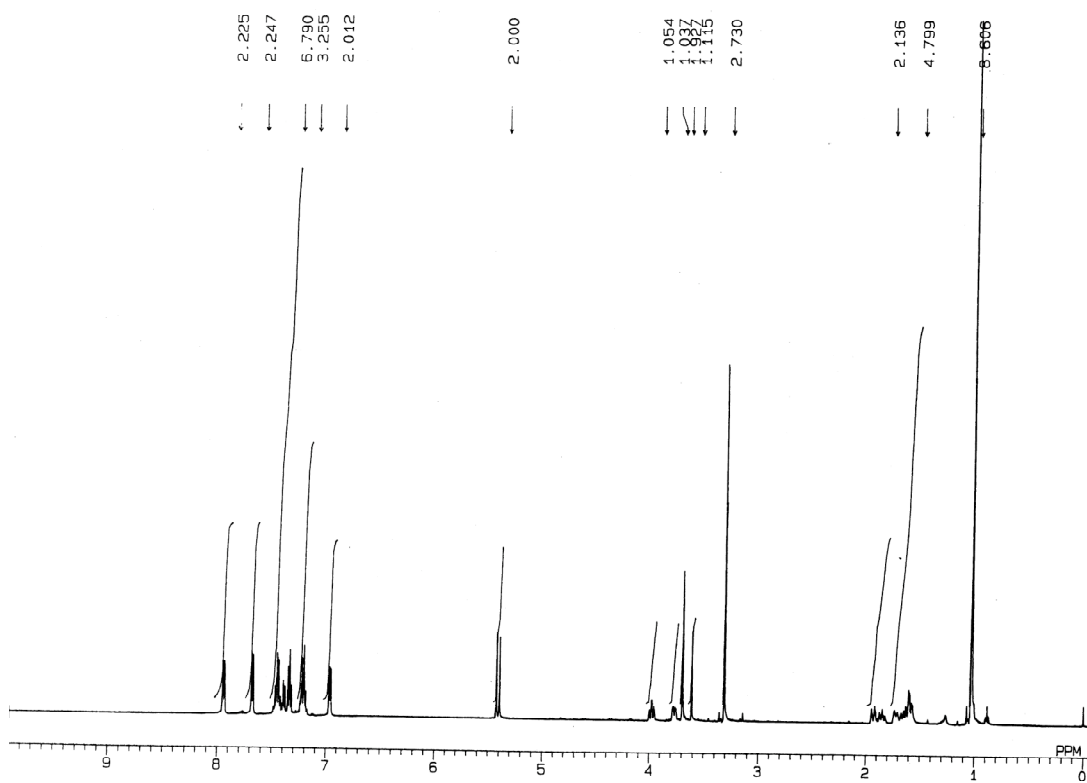

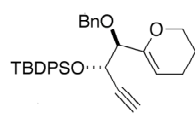

**24**

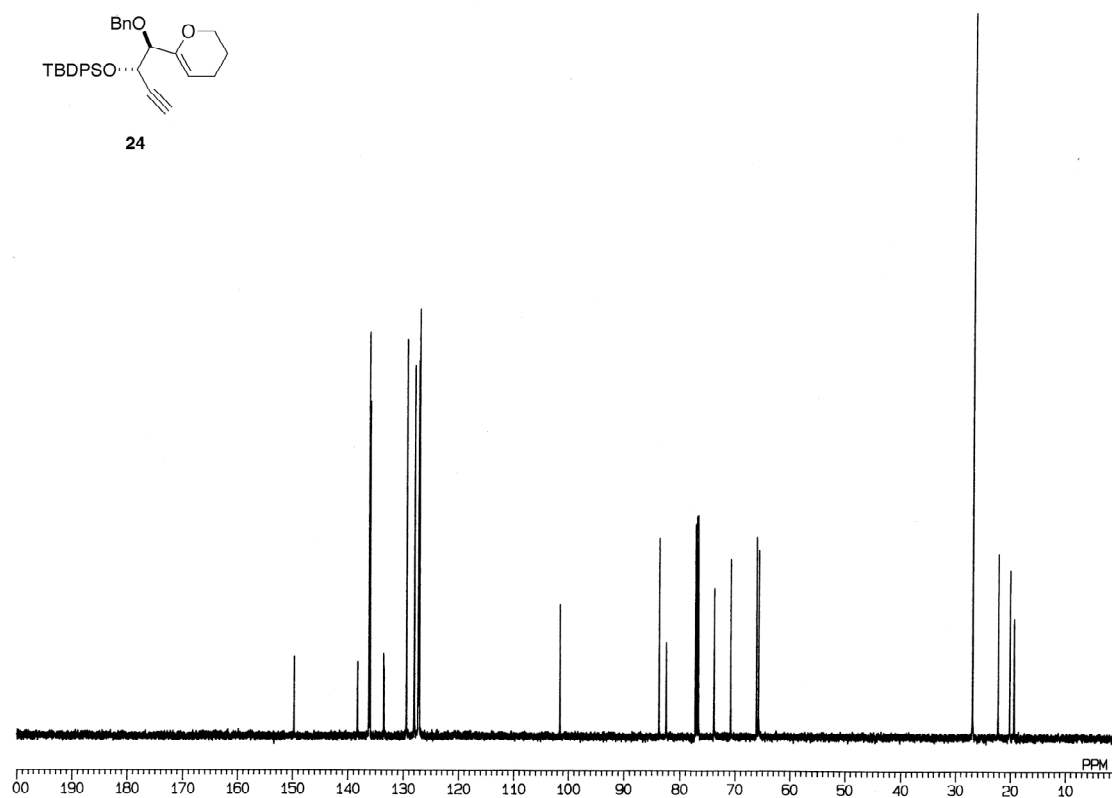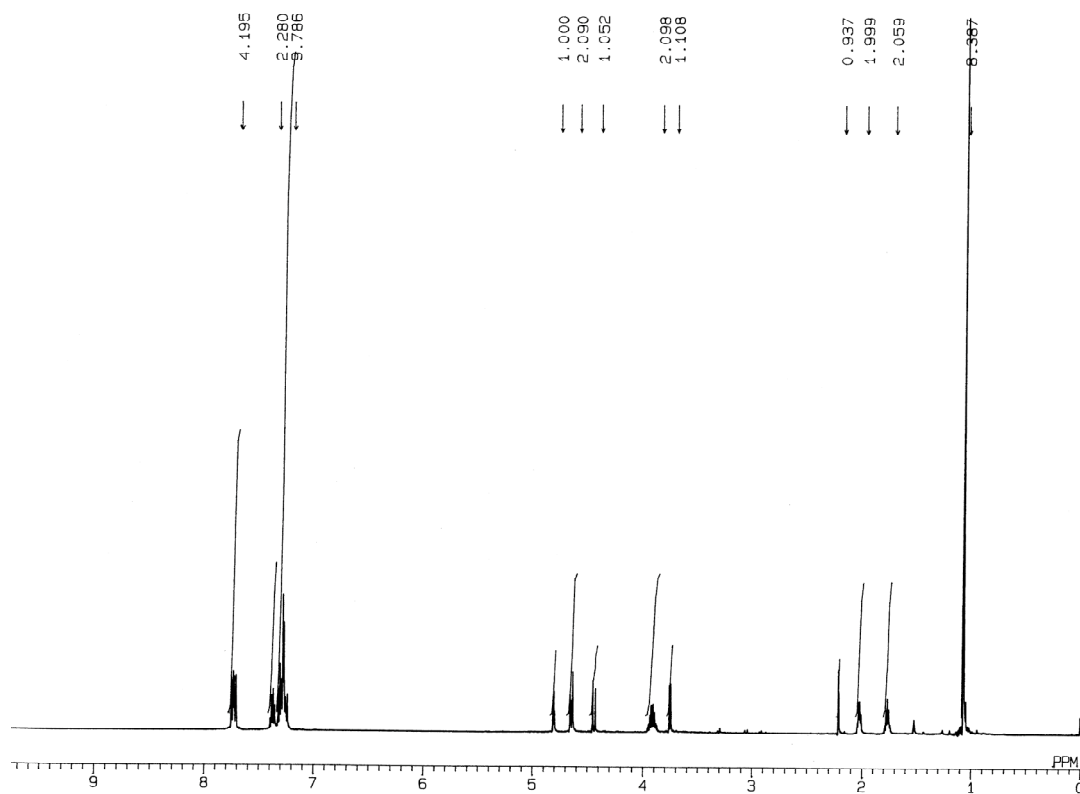

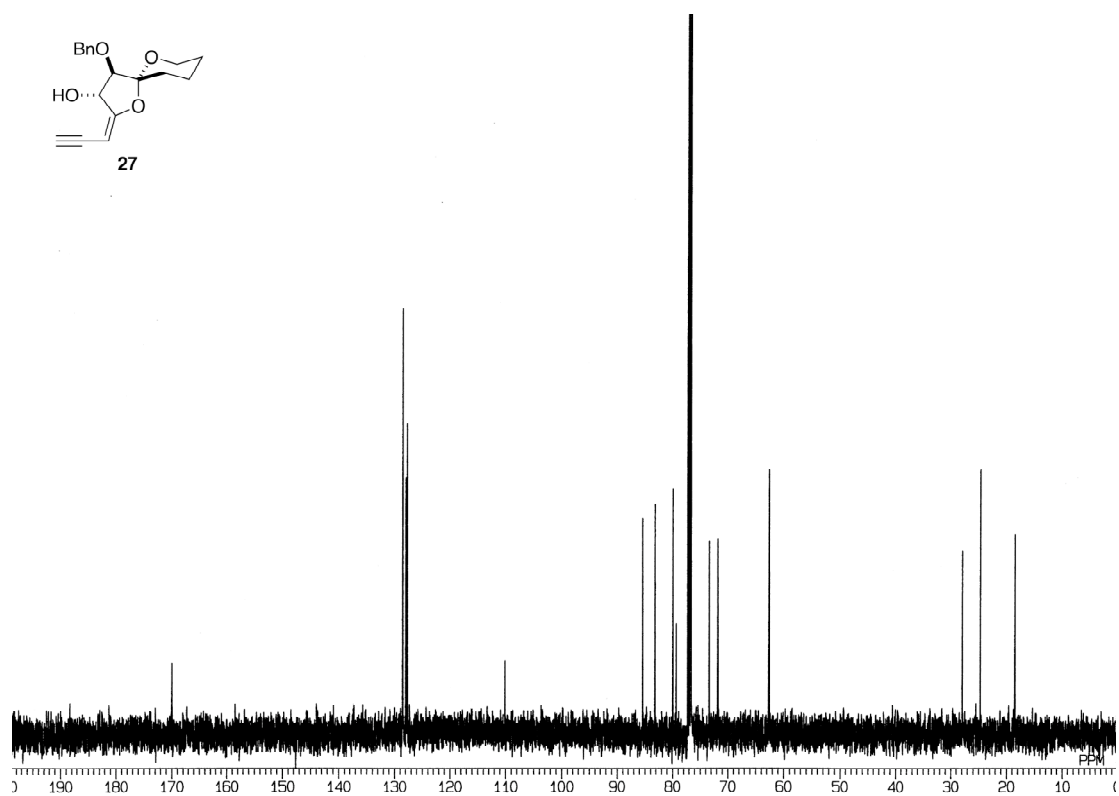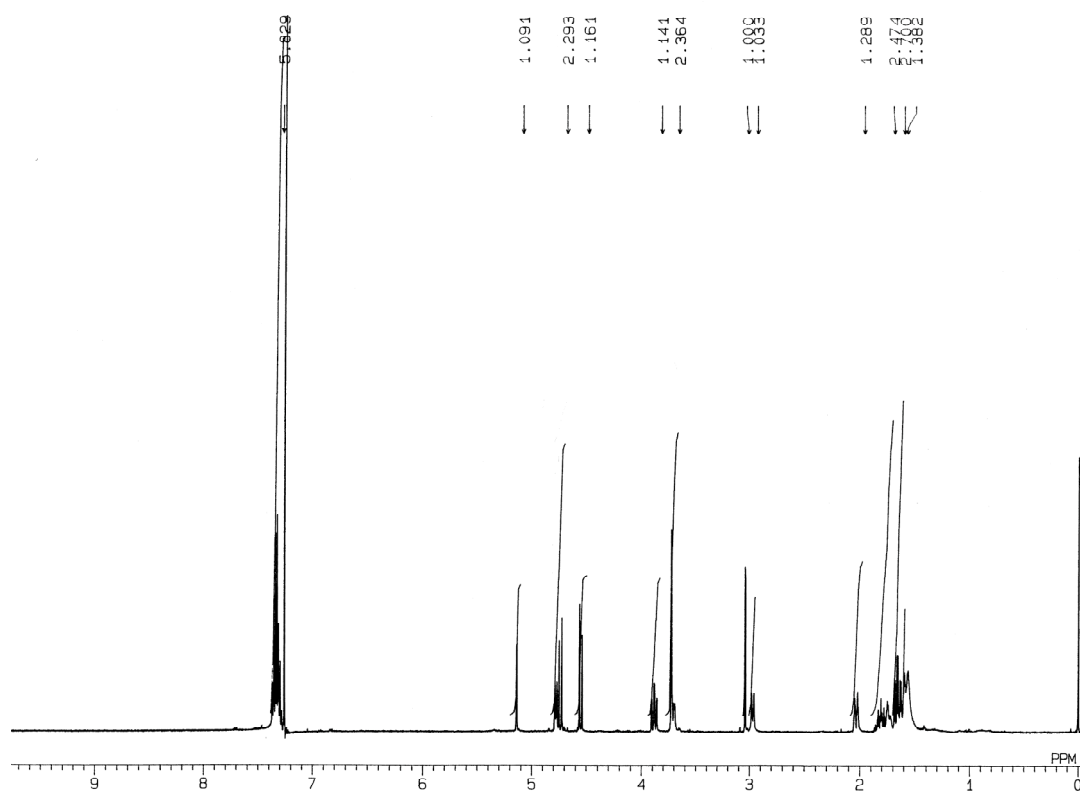



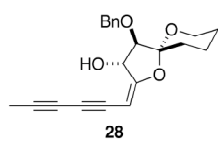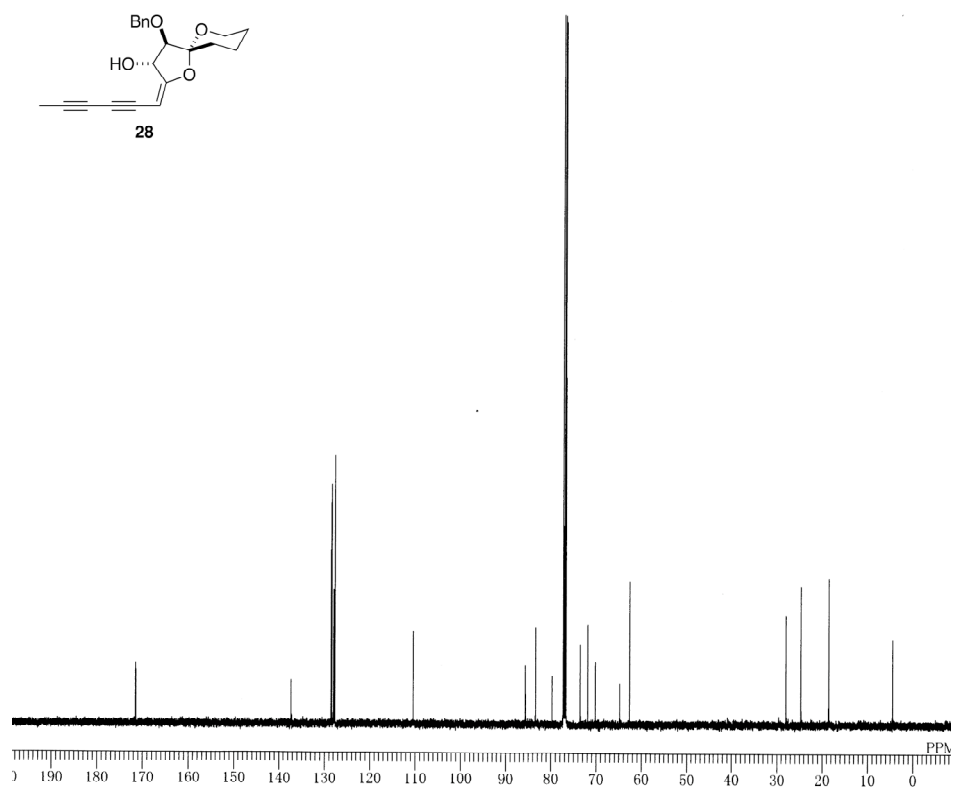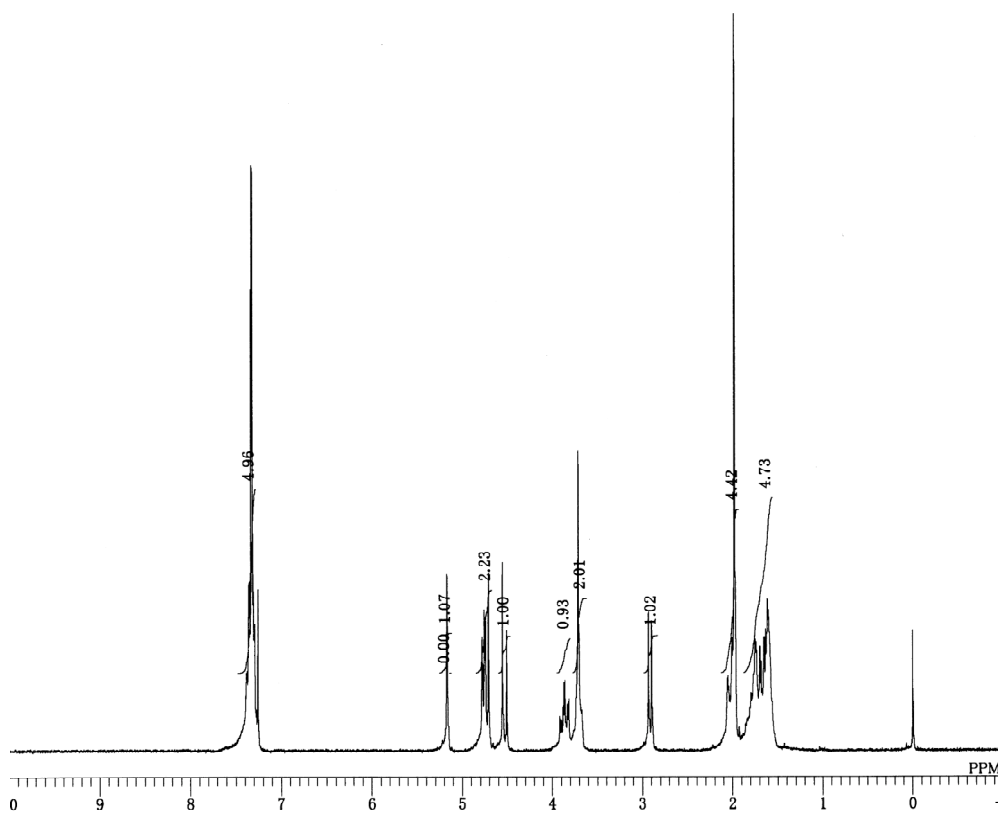

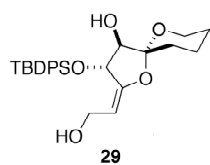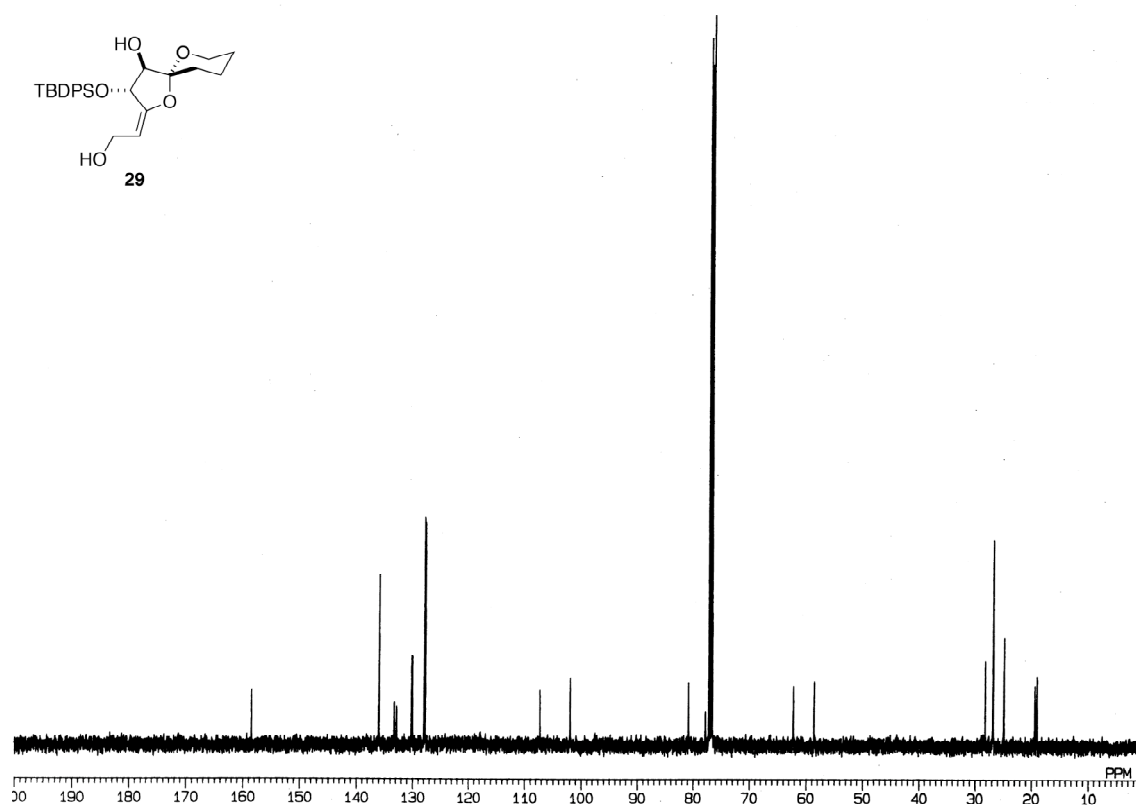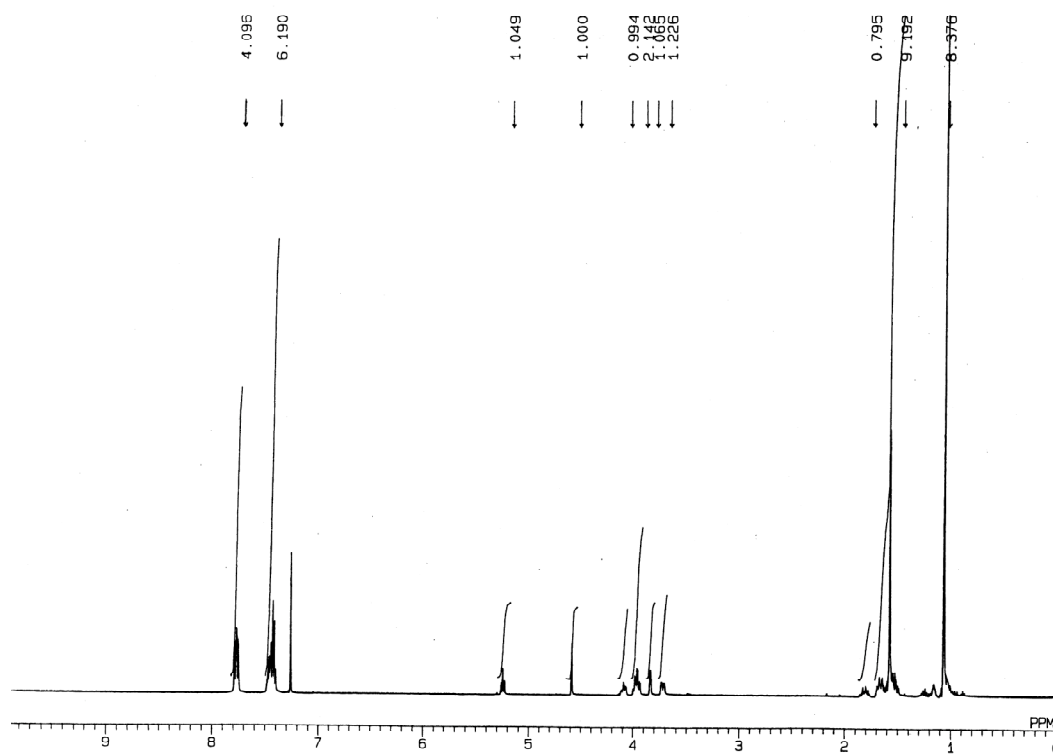

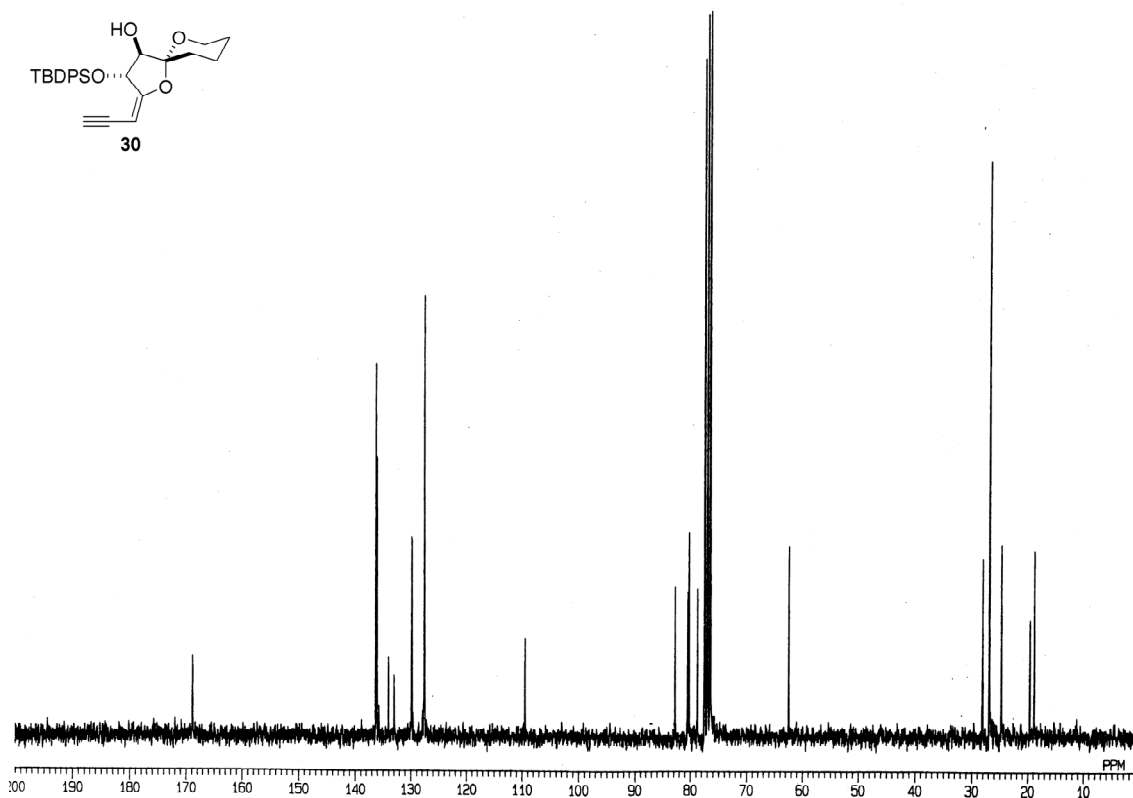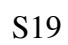

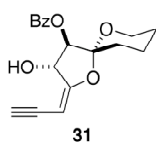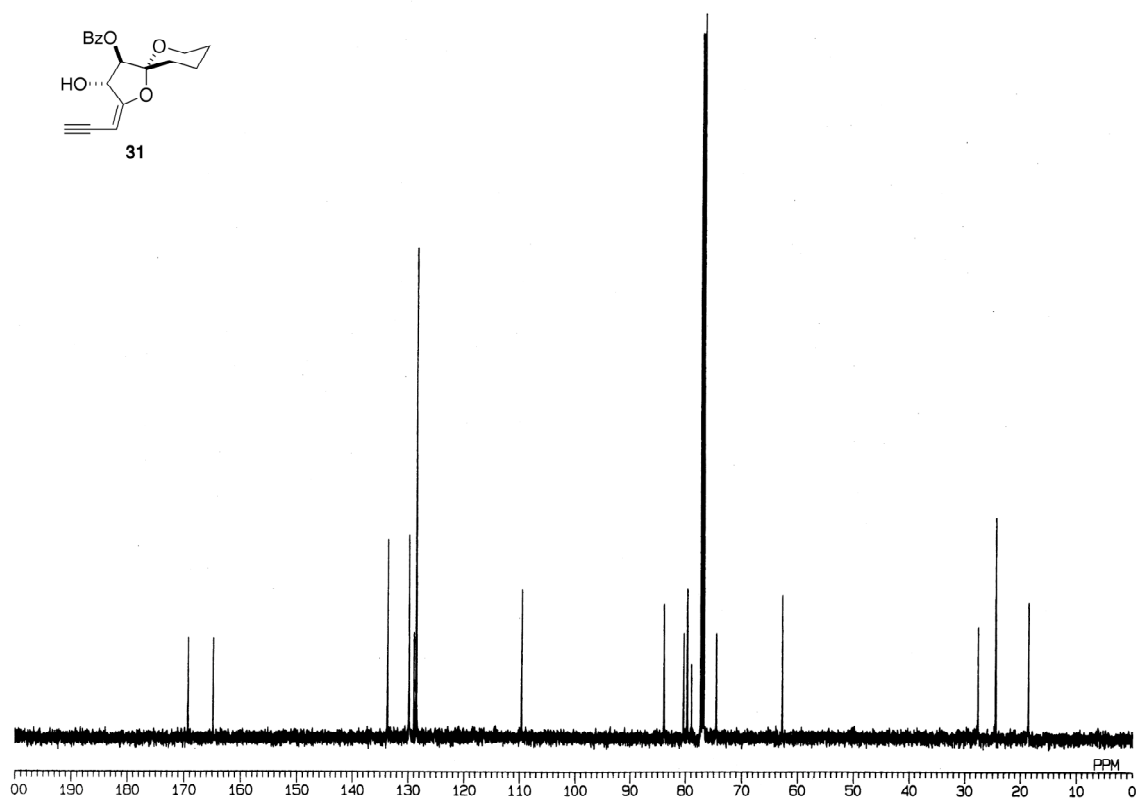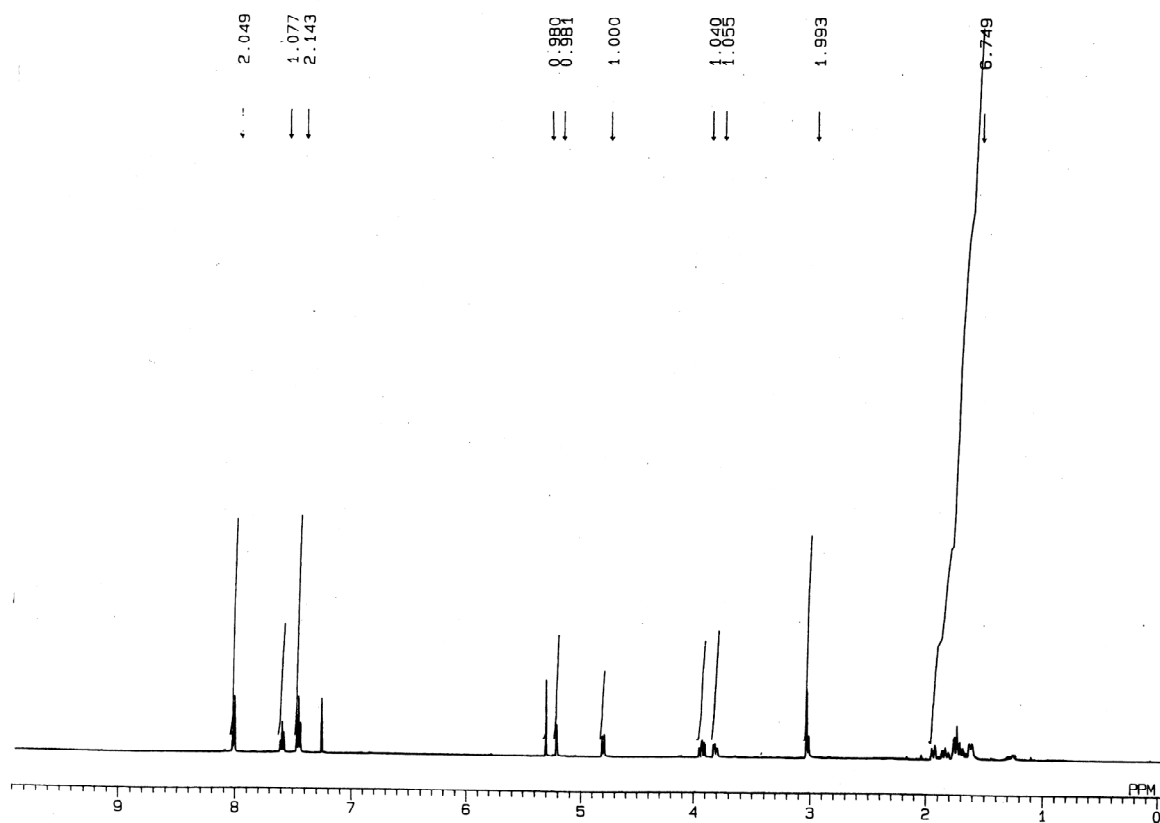

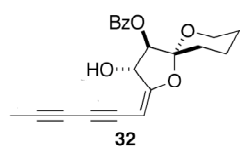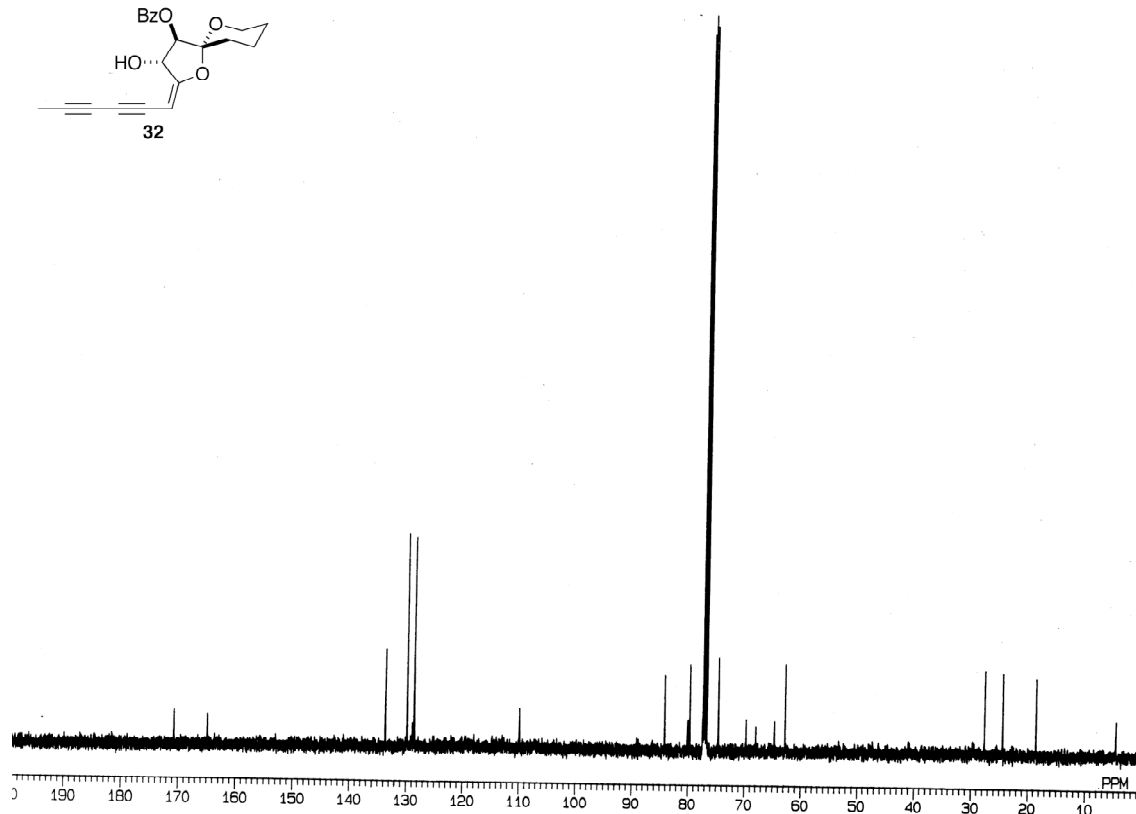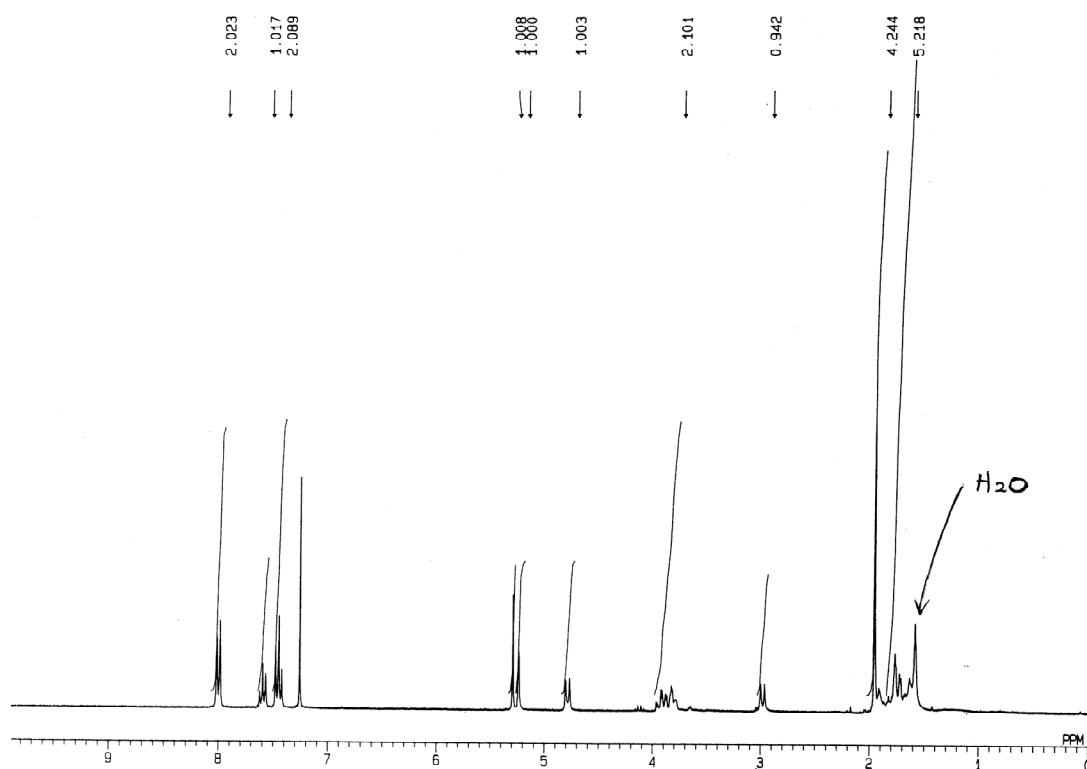

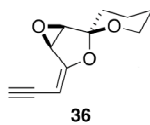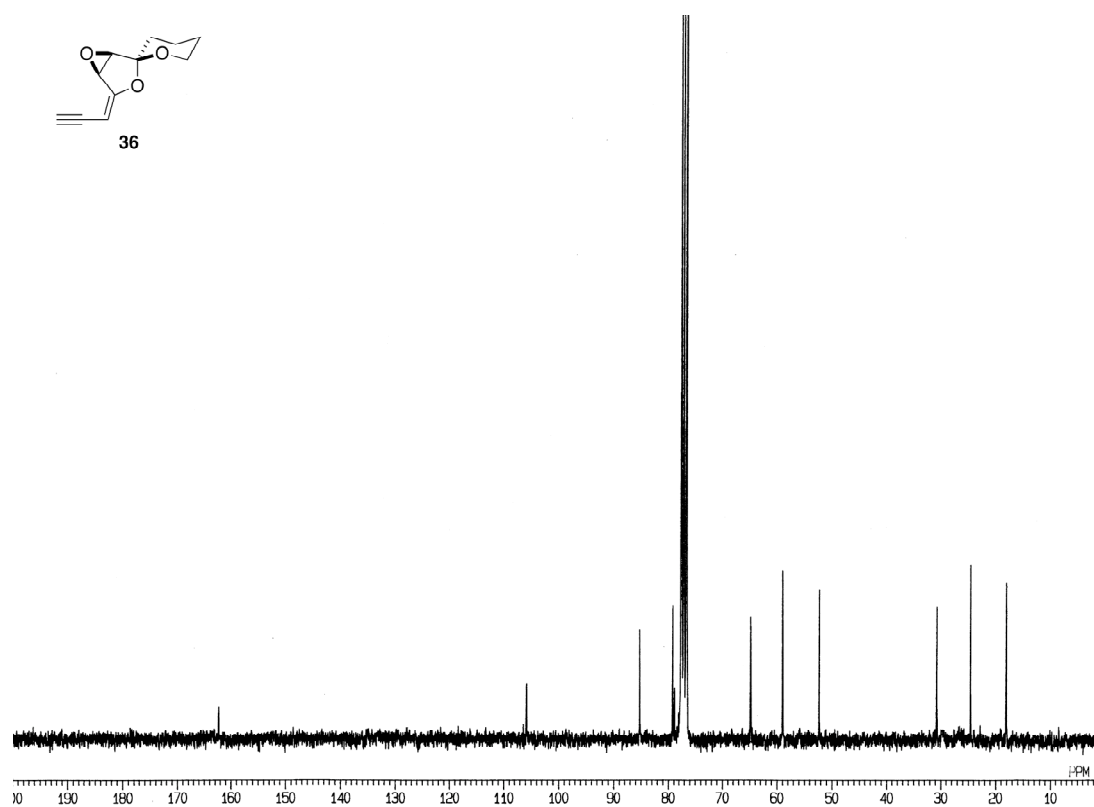

1.013  
 ↓  
 1.001  
 ↓  
 2.016  
 1.197  
 ↓  
 1.000  
 ↓  
 0.813  
 5.141  
 ↓

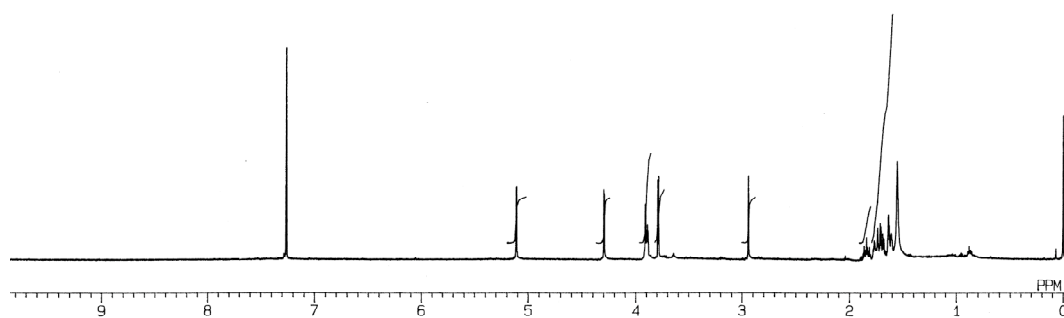

Supplement: Supplementary file 1 [file 5113975]
